# Supplementary material for: Prognostic peripheral blood biomarkers at ICU admission predict COVID-19 clinical outcomes
Source: PubMed Central journal article supplement (PMC9703061; doi:10.3389/fimmu.2022.1010216), 2022-11-14
Supplement: DataSheet_1.pdf [file DataSheet_1.pdf]

*Supplementary Material*

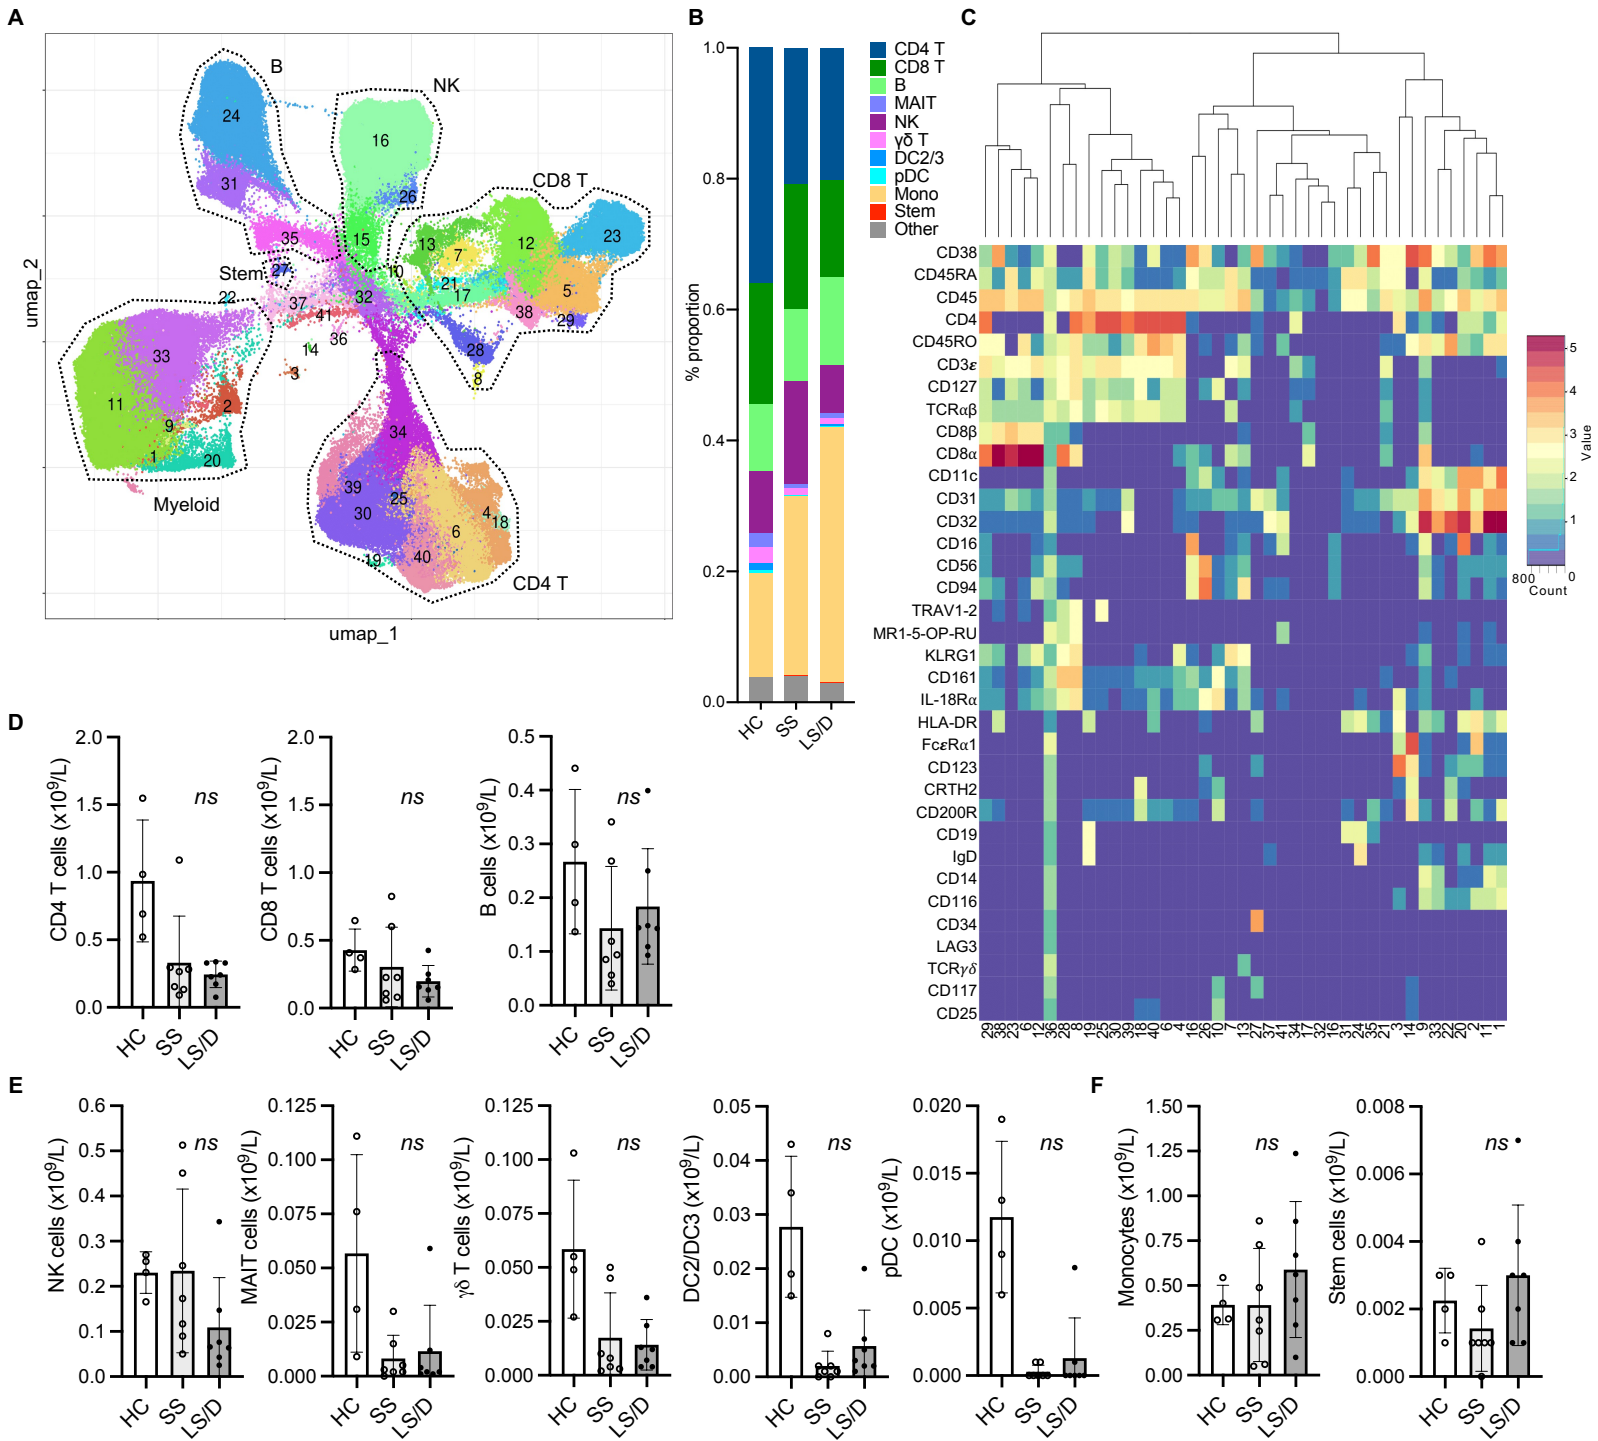

**Fig. S1. Major PBMC subsets fail to identify Long-Stay/Died patients (Initial Cohort).**

UMAP projection of ungated CyTOF-derived data from the Initial cohort (n=14) (A). Proportion of immune cell subsets in Healthy Controls (HC), Short-Stay (SS) and Long-Stay/Died (LS/D) patient outcome groups (B). Mean marker expression heatmap of clusters shown in a (C). Absolute counts of adaptive PBMC subsets (CD4 T, CD8 T, B) (D). Innate and unconventional subsets (NK, MAIT,  $\gamma\delta$  T, pDC, DC2/3) (E). Monocytes and stem cells (F). \*,  $p < 0.05$ ; \*\*,  $p < 0.01$ ; \*\*\*,  $p < 0.001$ ; ns,  $p \geq 0.05$  by two-tailed, two-sample unequal variance Student's t-test.

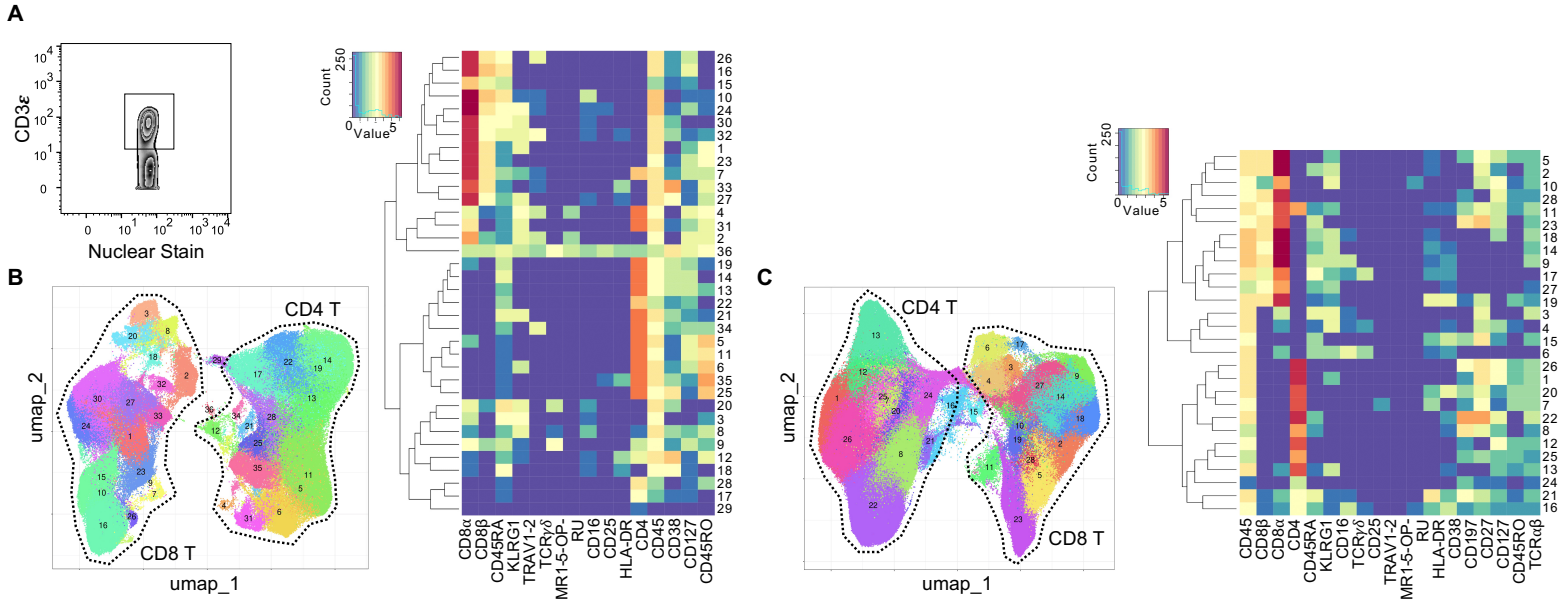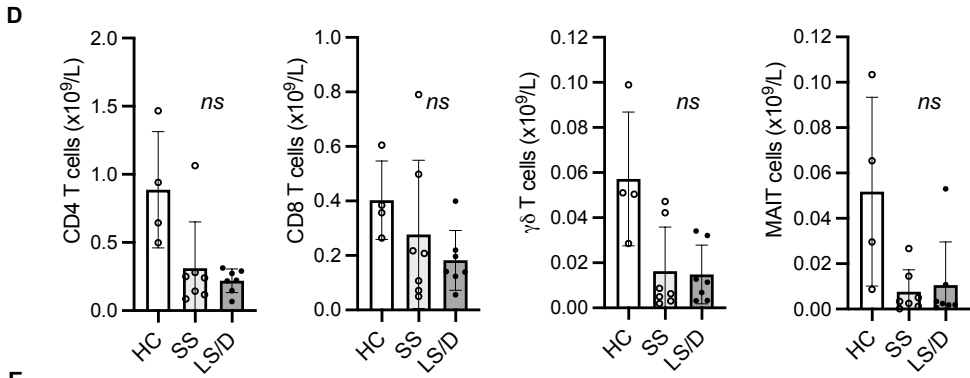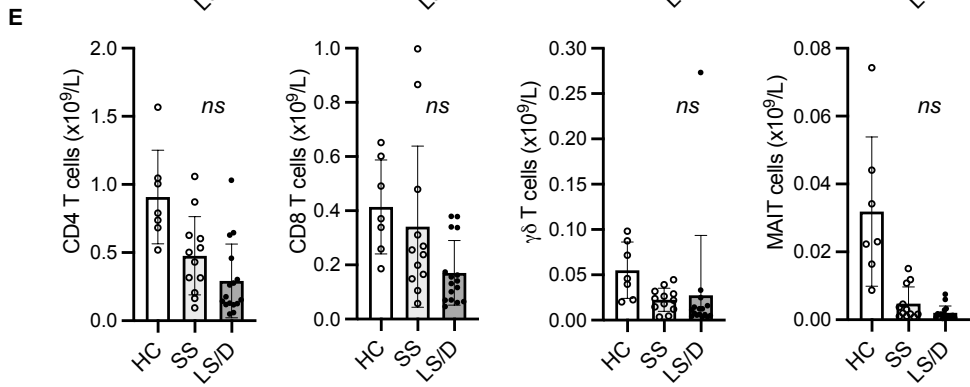

**Fig. S2. T cell subsets fail to identify Long-Stay/Died patients.** Representative gating of CD3<sup>+</sup> cells (**A**). Initial Cohort UMAP projections of CD3<sup>+</sup> gated cells (all samples combined; limited clustering channels) and mean marker expression heatmap (**B**). Same as in B but for the Replication Cohort (**C**). Initial Cohort absolute counts of T cell subsets identified based on gated clustering (**D**). Same as in D but for the Replication Cohort (**E**). \*,  $p < 0.05$ ; \*\*,  $p < 0.01$ ; \*\*\*,  $p < 0.001$ ; ns,  $p \geq 0.05$  by two-tailed, two-sample unequal variance Student's t-test.

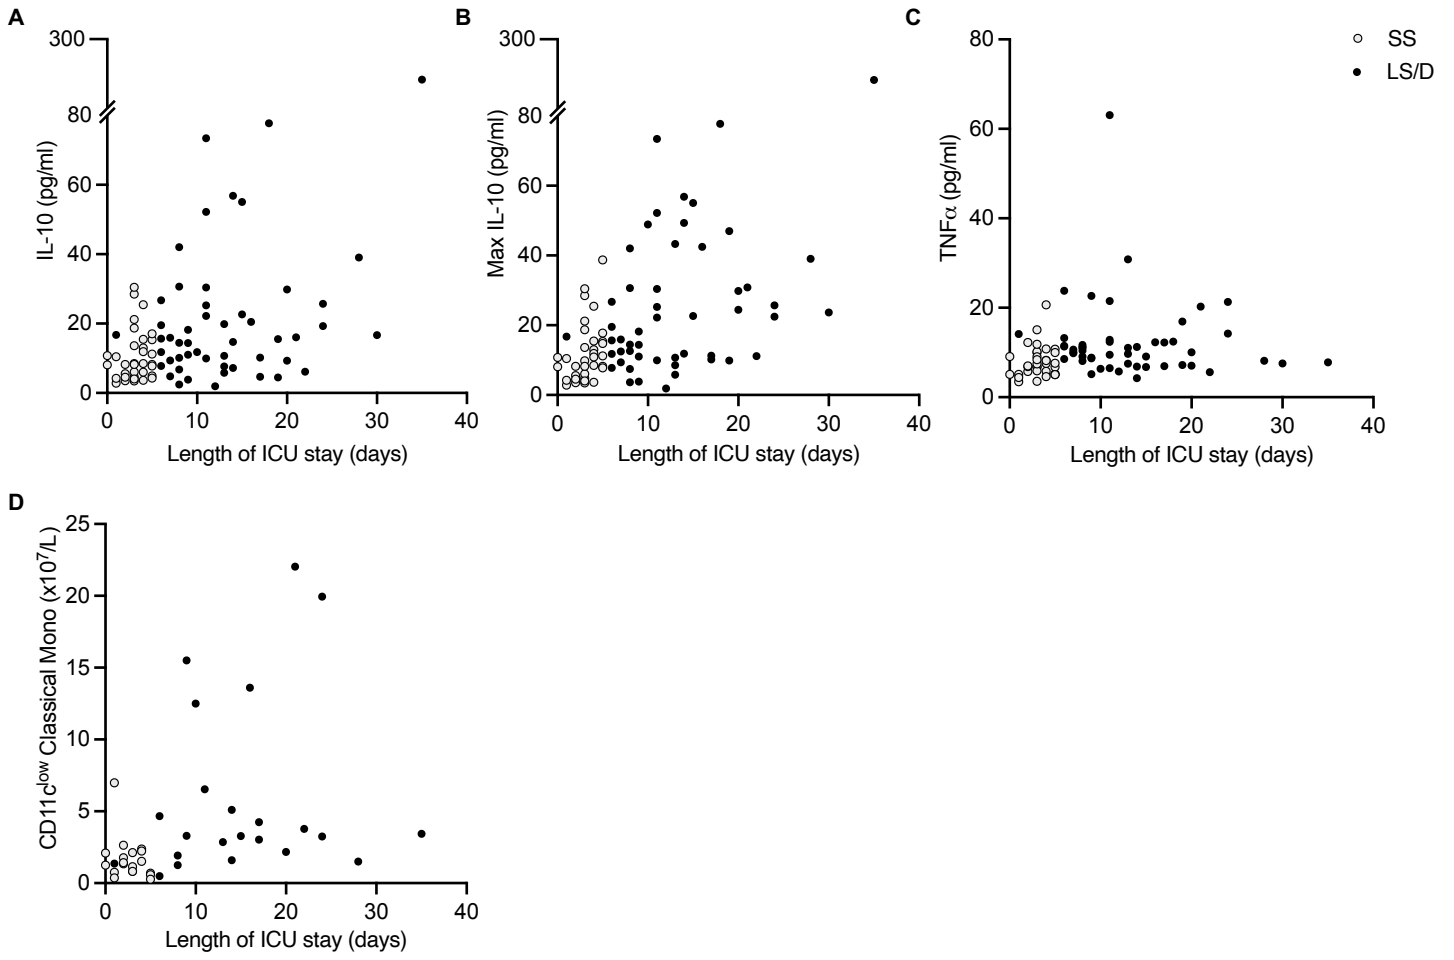

**Fig. S3. Cytokine and length of ICU stay correlations.** Correlations of length of ICU stay with ICU admission serum IL-10 levels (**A**), maximum serum IL-10 during ICU stay (**B**) serum TNF $\alpha$  ICU admission levels (**C**) and CD11c<sup>low</sup> Classical Monocytes (**D**). \*,  $p < 0.05$ ; \*\*,  $p < 0.01$ ; \*\*\*,  $p < 0.001$ ; ns,  $p \geq 0.05$  by two-tailed, two-sample unequal variance Student's t-test and  $R^2$  by two-tailed Pearson correlation with 95% confidence interval.

**Table S1. List of CyTOF antibodies**

| <b>Antibody/Tetramer</b>   | <b>Metal/Fluorophore*</b> | <b>Clone</b> | <b>Company</b>               | <b>Used in Cohort</b> |
|----------------------------|---------------------------|--------------|------------------------------|-----------------------|
| CD1c                       | 151Eu                     | L161         | <b>Biolegend</b>             | Replication           |
| CD3 $\epsilon$             | 143Nd                     | OKT3         | <b>Biolegend</b>             | both                  |
| CD4                        | 174Yb                     | SK3          | <b>Biolegend</b>             | both                  |
| CD8 $\alpha$               | 168Er                     | SK1          | <b>Biolegend</b>             | both                  |
| CD8 $\beta$                | 141Pr                     | SID18BEE     | <b>eBioscience</b>           | both                  |
| CD11c                      | 147Sm                     | Bu15         | <b>Biolegend</b>             | both                  |
| CD14                       | 153Eu                     | M5E2         | <b>Biolegend</b>             | both                  |
| CD16                       | 158Gd                     | 3G8          | <b>Biolegend</b>             | both                  |
| CD19                       | 142Nd                     | HIB19        | <b>Biolegend</b>             | both                  |
| CD25                       | 169Tm                     | BC96         | <b>Biolegend</b>             | both                  |
| CD27                       | 175Lu                     | O323         | <b>Biolegend</b>             | Replication           |
| CD31                       | 145Nd                     | WM59         | <b>Biolegend</b>             | both                  |
| CD32                       | 160Gd                     | IV.3         | <b>Stemcell Technologies</b> | both                  |
| CD34                       | 156Gd                     | 581          | <b>Biolegend</b>             | both                  |
| CD38                       | 106Cd                     | HIT2         | <b>Biolegend</b>             | both                  |
| CD45                       | 89Y                       | HI30         | <b>Biolegend</b>             | both                  |
| CD45RA                     | 110Cd                     | HI100        | <b>Biolegend</b>             | both                  |
| CD45RO                     | 112Cd                     | UCHL1        | <b>Biolegend</b>             | both                  |
| CD56                       | 148Nd                     | NCAM16.2     | <b>BD Bioscience</b>         | both                  |
| CD94 (NKG2C)               | 161Dy                     | DX22         | <b>Biolegend</b>             | both                  |
| CD116                      | 150Nd                     | 4H1          | <b>Biolegend</b>             | both                  |
| CD117                      | 171Yb                     | 104D2        | <b>Biolegend</b>             | Initial               |
| CD123                      | 164Dy                     | 6H6          | <b>Biolegend</b>             | both                  |
| CD127                      | 165Ho                     | A019D5       | <b>Biolegend</b>             | both                  |
| CD161                      | 159Tb                     | HP-3G10      | <b>Biolegend</b>             | both                  |
| CD197/CCR7                 | 171Dy                     | G043H7       | <b>Biolegend</b>             | Replication           |
| CD200R                     | 173Yb                     | 0X-108       | <b>BD Bioscience</b>         | both                  |
| CD294 (CRTH2)              | 163Dy                     | BM16         | <b>Biolegend</b>             | both                  |
| CD301 (CLEC10A)            | 154Sm                     | H037G3       | <b>Biolegend</b>             | Replication           |
| CD304 (NRP1)               | 172Yb                     | 12C2         | <b>Biolegend</b>             | Replication           |
| Fc $\epsilon$ R $\alpha$ 1 | 176Yb                     | AER-37       | <b>Biolegend</b>             | both                  |
| HLA-DR                     | 170Er                     | L243         | <b>Biolegend</b>             | both                  |
| IgD                        | 116Cd                     | IA6-2        | <b>Biolegend</b>             | both                  |
| IL-18R $\alpha$            | 162Dy                     | H44          | <b>Biolegend</b>             | both                  |
| KLRG1                      | 144Nd                     | SA231A2      | <b>Biolegend</b>             | both                  |
| LAG3                       | 175Lu                     | 11C3C65      | <b>Biolegend</b>             | Initial               |
| TCR $\alpha\beta$          | 155Gd                     | T10B9.1A-31  | <b>BD Bioscience</b>         | both                  |
| TCR $\gamma\delta$         | 152Sm                     | B1           | <b>Biolegend</b>             | both                  |
| TRAV1-2                    | 115Ln                     | 3C10         | <b>Biolegend</b>             | both                  |
| Anti-APC (Secondary)       | 149Sm                     | APC003       | <b>Biolegend</b>             | both                  |
| MR1-5-OP-RU (Primary)      | APC                       | NA           | <b>NIH Tetramer Facility</b> | both                  |



**Table S2. Mean absolute counts and p-values (ungated cluster analyses)**

| Cohort                                     | Total cell subset | H     | SS    | LS/D  | H vs SS  | H vs LS/D | SS vs LS/D |
|--------------------------------------------|-------------------|-------|-------|-------|----------|-----------|------------|
| Mean absolute counts (x10 <sup>9</sup> /L) |                   |       |       |       | p-values |           |            |
| Initial                                    | CD4 T cells       | 0.936 | 0.330 | 0.244 | 0.067    | 0.053     | 0.549      |
|                                            | CD8 T cells       | 0.428 | 0.304 | 0.198 | 0.383    | 0.049     | 0.402      |
|                                            | B cells           | 0.267 | 0.143 | 0.184 | 0.176    | 0.335     | 0.509      |
|                                            | Monocytes         | 0.392 | 0.392 | 0.589 | 0.997    | 0.237     | 0.311      |
|                                            | Stem cells        | 0.002 | 0.001 | 0.003 | 0.247    | 0.315     | 0.088      |
|                                            | NK cells          | 0.230 | 0.234 | 0.109 | 0.961    | 0.032     | 0.150      |
|                                            | MAIT cells        | 0.057 | 0.008 | 0.012 | 0.122    | 0.140     | 0.721      |
|                                            | γδ T cells        | 0.058 | 0.018 | 0.014 | 0.077    | 0.065     | 0.705      |
|                                            | pDC               | 0.012 | 0.000 | 0.001 | 0.029    | 0.028     | 0.473      |
|                                            | DC2/3             | 0.028 | 0.002 | 0.006 | 0.026    | 0.034     | 0.205      |
| Replication                                | CD4 T cells       | 0.911 | 0.511 | 0.309 | 0.008    | <0.001    | 0.112      |
|                                            | CD8 T cells       | 0.386 | 0.374 | 0.184 | 0.914    | 0.005     | 0.090      |
|                                            | B cells           | 0.247 | 0.285 | 0.237 | 0.584    | 0.871     | 0.565      |
|                                            | Monocytes         | 0.403 | 0.657 | 0.740 | 0.041    | 0.028     | 0.618      |
|                                            | Stem cells        | 0.002 | 0.004 | 0.003 | 0.223    | 0.451     | 0.360      |
|                                            | NK cells          | 0.259 | 0.179 | 0.199 | 0.108    | 0.269     | 0.708      |
|                                            | MAIT cells        | 0.047 | 0.007 | 0.003 | 0.001    | 0.000     | 0.076      |
|                                            | γδ T cells        | 0.058 | 0.022 | 0.028 | 0.003    | 0.130     | 0.732      |
|                                            | pDC               | 0.009 | 0.001 | 0.001 | <0.001   | <0.001    | 0.575      |
|                                            | DC2/3             | 0.037 | 0.014 | 0.012 | 0.003    | 0.001     | 0.829      |

p-values calculated using a two-tailed, two-sample unequal variance Student's t-test.  
H = Healthy; SS = Short-Stay; LS/D = Long-Stay/Died

**Table S3. Mean absolute counts and p-values (gated monocyte and T cell cluster analyses)**

| Cohort                                     | Monocyte subset                | H     | SS    | LS/D  | H vs SS  | H vs LS/D | SS vs LS/D |
|--------------------------------------------|--------------------------------|-------|-------|-------|----------|-----------|------------|
| Mean absolute counts (x10 <sup>9</sup> /L) |                                |       |       |       | p-values |           |            |
| Initial                                    | CD11c <sup>low</sup> Classical | 0.004 | 0.019 | 0.082 | 0.536*   | 0.133*    | 0.388*     |
|                                            | Total Classical                | 0.108 | 0.110 | 0.181 | 0.620    | 0.136     | 0.212      |
|                                            | Total Intermediate             | 0.218 | 0.247 | 0.377 | 0.939    | 0.234     | 0.338      |
|                                            | Total Non-Classical            | 0.019 | 0.020 | 0.011 | 0.844    | 0.080     | 0.462      |
|                                            | CD4 T cells                    | 0.888 | 0.312 | 0.219 | 0.010    | 0.004     | 0.506      |
|                                            | CD8 T cells                    | 0.403 | 0.277 | 0.182 | 0.309    | 0.005     | 0.415      |
|                                            | MAIT cells                     | 0.052 | 0.008 | 0.011 | 0.014    | 0.018     | 0.724      |
|                                            | γδ T cells                     | 0.057 | 0.016 | 0.015 | 0.009    | 0.006     | 0.868      |
| Replication                                | CD11c <sup>low</sup> classical | 0.001 | 0.015 | 0.058 | <0.001*  | 0.010*    | 0.076*     |
|                                            | Total Classical                | 0.117 | 0.193 | 0.271 | 0.035    | 0.010     | 0.167      |
|                                            | Total Intermediate             | 0.196 | 0.412 | 0.422 | 0.025    | 0.021     | 0.925      |
|                                            | Total Non-Classical            | 0.022 | 0.026 | 0.015 | 0.890    | 0.061     | 0.404      |
|                                            | CD4 T cells                    | 0.899 | 0.477 | 0.292 | 0.004    | 0.061     | 0.098      |
|                                            | CD8 T cells                    | 0.412 | 0.341 | 0.171 | 0.489    | <0.001    | 0.083      |
|                                            | MAIT cells                     | 0.035 | 0.005 | 0.002 | 0.001    | <0.001    | 0.093      |
|                                            | γδ T cells                     | 0.055 | 0.022 | 0.028 | 0.003    | 0.140     | 0.769      |

p-values calculated using a two-tailed, two-sample unequal variance Student's t-test.

H = Healthy; SS = Short-Stay; LS/D = Long-Stay/Died

\*p-values that have been Bonferroni-adjusted for multiple comparisons

**Table S4. Cell surface protein signatures for cluster assignment**

| Analyses                                     | Cell type                         | Cell surface protein signatures for cluster assignment                           |
|----------------------------------------------|-----------------------------------|----------------------------------------------------------------------------------|
|                                              | CD4 T cells                       | CD3+ TCR $\alpha\beta$ + CD4+ CD8-                                               |
|                                              | CD8 T cells                       | CD3+ TCR $\alpha\beta$ + CD4- CD8+                                               |
|                                              | B cells                           | HLA-DR+ IgD+ CD19+                                                               |
|                                              | Monocytes                         | CD116+ CD3- CD19- CD11c+ HLA-DR+ CD32+                                           |
| Ungated                                      | Stem cells                        | CD34+                                                                            |
|                                              | NK cells                          | CD94+ CD3- CD116-                                                                |
|                                              | MAIT cells                        | CD3+ TCR $\alpha\beta$ + IL-18R $\alpha$ + MR1-5-OP-RU+                          |
|                                              | $\gamma\delta$ T cells            | CD3+ TCR $\alpha\beta$ - TCR $\gamma\delta$ +                                    |
|                                              | pDC                               | CD11c- NRP1+ CD123+ Fc $\epsilon$ R $\alpha$ 1+ CD116+ HLA-DR+                   |
|                                              | DC2/3                             | CD11c+ CD1c+ NRP1- CD123+ Fc $\epsilon$ R $\alpha$ 1+ HLA-DR+                    |
|                                              | CD11c <sup>low</sup><br>classical | CD116+ CD14 <sup>high</sup> CD16- CD11c <sup>low</sup>                           |
| Gated on CD3-<br>CD19- CD116+<br>(Monocytes) | Total Classical                   | CD116+ HLA-DR+ CD14 <sup>high</sup> CD16- CD123-                                 |
|                                              | Total Intermediate                | CD116+ HLA-DR+ CD14 <sup>high/int</sup> CD16 <sup>low</sup> CD123 <sup>low</sup> |
|                                              | Total Non-Classical               | CD116+ HLA-DR+ CD14 <sup>low</sup> CD16 <sup>high</sup>                          |

**Table S5. Sensitivity and specificity calculations for serum IL-6.**

|                                       | <b>Sensitivity</b> | <b>Specificity</b> | <b>False Positives</b> | <b>False Negatives</b> | <b>LR+</b> |
|---------------------------------------|--------------------|--------------------|------------------------|------------------------|------------|
| IL-6 screen (Cytokine Cohort; n = 90) | 39%<br>(22/56)     | 76%<br>(22/29)     | 24%<br>(7/29)          | 42%<br>(24/56)         | 1.6        |
